# Supplementary material
Source: PubMed Central journal article supplement (PMC2536694)
Supplement: NIHMS64039-supplement-1si20060614_12.pdf [file NIHMS64039-supplement-1si20060614_12.pdf]

# Functional DNazymes Organized into 2D Arrays

Alejandra V. Garibotti, Scott M. Knudsen,<sup>§</sup> Andrew D. Ellington<sup>§</sup> and Nadrian C. Seeman\*

## SUPPLEMENTARY MATERIAL

This supplementary material contains two parts. The first part shows sample cleavages of the DNazymes R12 and its modification S4/C4. The second part shows the sequences of the five tiles used in this study.

### Cleavage of R12

Conditions: Buffer A containing: 50 mM HEPES, pH 7, 500 mM NaCl, 50 mM MgCl<sub>2</sub>, 5 mM EDTA; Fast annealing; DNA traces, Denaturing 20 % gel.



Lane 1: 50 base marker

Lane 2: R12 control

Lane 3: R12 in the presence of 30  $\mu$ M CuCl<sub>2</sub> showing the cleavage products. The cleavage yield relative to the 14-mer product is approximately 33%.

## Cleavage of S4/C4.

Conditions: Buffer A containing: 50 mM HEPES, pH 7, 500 mM NaCl, 50 mM MgCl<sub>2</sub>, 5 mM EDTA;  
Fast annealing; Denaturing 20 % gel.



Lane 1: 10 base marker

Lane 2: Control containing C4 (5 μM) and traces of S4\*.

Lane 3: C4 (5 μM), traces of S4\*, CuCl<sub>2</sub> 10 μM, the cleavage yield is very low.

Lane 4: C4 (5 μM), traces of S4\*, CuCl<sub>2</sub> 30 μM; the cleavage yield is ~ 70%.

# Tile Sequences

## TILE A



## TILE B + R12



## TILE B + S4/C4



## TILE C



# TILE D
